# Supplementary material
Source: publisher figshare collection journal article supplement (https://tandf.figshare.com/articles/dataset/_/5627347)
Supplement: Supplementary file 2 [file 1]

## SUPPLEMENTARY TABLES

### **Genome-wide linkage and haplotype sharing analysis implicates the MCDR3 locus as a candidate region for a developmental macular disorder in association with digit abnormalities**

Cipriani V,<sup>1,2,3</sup> Kalhor A,<sup>1,2</sup> Arno G,<sup>1,2</sup> Silva RS,<sup>1,2</sup> Pontikos N,<sup>1,3</sup> Puech V,<sup>4</sup> McClements ME,<sup>5</sup> Hunt DM,<sup>6</sup> van Heyningen V,<sup>1</sup> Michaelides M,<sup>1,2</sup> Webster AR,<sup>1,2</sup> Moore AT,<sup>1,2,7</sup> Puech B<sup>4</sup>

<sup>1</sup>UCL Institute of Ophthalmology, London, UK, <sup>2</sup>Moorfields Eye Hospital, London, UK, <sup>3</sup>UCL Genetics Institute, London, UK, <sup>4</sup>Service d'Exploration de la Vision CHU, Lille, France, <sup>5</sup>Nuffield Department of Clinical Neurosciences (Ophthalmology), University of Oxford, Oxford, UK, <sup>6</sup>Lions Eye Institute and School of Animal Biology, University of Western Australia, Perth, Australia, <sup>7</sup>Ophthalmology Department, UCSF School of Medicine, San Francisco, CA, USA

**Corresponding authors:** Valentina Cipriani, PhD, UCL Institute of Ophthalmology, Department of Ocular Biology and Therapeutics, University College London, Wolfson Building (3rd floor, Room 3/5), 11-43 Bath Street, London, EC1V 9EL, United Kingdom; [v.cipriani@ucl.ac.uk](mailto:v.cipriani@ucl.ac.uk); Phone: +44 (0)207 608 4042; Fax: +44 (0)207 608 6830; Bernard Puech, MD, Hôpital Roger Salengro, SEVNO, Rue Emile Laine, 59037, Lille, Cedex, France; [bernard.puech@yahoo.fr](mailto:bernard.puech@yahoo.fr); Phone: + 33 320446286; Fax: +33 320446288.

**Supplementary Table 1**

**Supplementary Table 2**

**Supplementary Table 3**

**Supplementary Table 4**

**Supplementary Table 5**

**Supplementary Table 1** Primer sequences used for segregation analysis of candidate variants identified in the whole-exome sequencing analysis.

| Gene            | Primer sequence |                                     | Length (bp) |
|-----------------|-----------------|-------------------------------------|-------------|
| <i>ZNF774</i>   | F               | 5' - GTTGGGGAGGAACTGGGAG - 3'       | 402         |
|                 | R               | 5' - ACTCTGGGCACTCATAGGGT - 3'      |             |
| <i>TTC31</i>    | F               | 5' - GAAGGATGGGTGGAATGAGA - 3'      | 554         |
|                 | R               | 5' - GATGTGGGGCTCCTTTCTCT - 3'      |             |
| <i>SH3RF1</i>   | F               | 5' - GGATTTTAGCAGATGTAGACATGG - 3'  | 494         |
|                 | R               | 5' - CAGCAAAACCTCTTTCAATGG - 3'     |             |
| <i>ANKRD33B</i> | F               | 5' - TTCACGTCTAGGCCCTCACT - 3'      | 559         |
|                 | R               | 5' - GGAGCTTGATCTGCCCATAC - 3'      |             |
| <i>PCDHA8</i>   | F               | 5' - TGTACACGGGCGAGATCAG - 3'       | 606         |
|                 | R               | 5' - CGGTGAAAAACTAAATCTGAAACA - 3'  |             |
| <i>IKBKB</i>    | F               | 5' - AGCGATGGGTGTGTGATGTA - 3'      | 621         |
|                 | R               | 5' - GTGAAGGCTCAGAATCCACA - 3'      |             |
| <i>SMARCA2</i>  | F               | 5' - ATGAGACCTCGGTCCCTCTT - 3'      | 599         |
|                 | R               | 5' - CTATTAAAAAGGCAATAAACAAAGC - 3' |             |
| <i>NEK3</i>     | F               | 5' - TGGTTGCACAATATTTTGAATGT - 3'   | 691         |
|                 | R               | 5' - TCCGCAAATATTCCTCTTG - 3'       |             |
| <i>MPI</i>      | F               | 5' - CAAGGGTCACGATGTGGAG - 3'       | 699         |
|                 | R               | 5' - GAGAGGGAAGACAAAGGGAGT - 3'     |             |
| <i>CCNF</i>     | F               | 5' - GGGTGTTAGAGGCAGGTGTG - 3'      | 567         |
|                 | R               | 5' - ACTCCAGACAGGGTCTCTGC - 3'      |             |
| <i>RAX2</i>     | F               | 5' - ACGGTTGCTCCATGACCTC - 3'       | 576         |
|                 | R               | 5' - GAAGCAGCAGGTAGGAGTCG - 3'      |             |
| <i>CAPS</i>     | F               | 5' - CCAGTCACCACCTCCTGTC - 3'       | 674         |
|                 | R               | 5' - TGCAAGATCTCTGGTCAGCA - 3'      |             |
| <i>C22orf15</i> | F               | 5' - TGGGCAACTCCCTACTGAAG - 3'      | 561         |
|                 | R               | 5' - ACCTTTCTGGGCCTTGAAGT - 3'      |             |

|                  |   |                                |     |
|------------------|---|--------------------------------|-----|
| <i>HIST1H2BJ</i> | F | 5' – TGAGAACATGGGTGGCTCTT - 3' | 600 |
|                  | R | 5' – CCTGACCTCTGACGTTACCC - 3' |     |
| <i>EPHX2</i>     | F | 5' - AGACACACCCATCTGCCTTC- 3'  | 205 |
|                  | R | 5' - AAAGCCAGCACAATGAAACC- 3'  |     |

Primers were designed using Primer3 software.

**Supplementary Table 2** Linkage analysis in four individuals (3 affected, 1 unaffected) from family GC16334.

| Chr | Genetic position (cM) |        | Physical position (bp) |           | SNP          |            | Linkage analysis |
|-----|-----------------------|--------|------------------------|-----------|--------------|------------|------------------|
|     | Start                 | End    | Start                  | End       | Start        | End        | max LOD          |
| 1   | 3.63                  | 13.18  | 3245399                | 7408904   | rs2483280    | rs12088178 | 0.60             |
| 1   | 14.13                 | 23.92  | 8278054                | 13832868  | rs3850464    | rs12060059 | 0.60             |
| 1   | 232.26                | 242.21 | 227235445              | 233057127 | rs7517398    | rs883278   | 0.60             |
| 2   | 37.03                 | 100.32 | 16318056               | 75634513  | rs4099911    | rs11126476 | 0.60             |
| 3   | 49.68                 | 50.38  | 27204290               | 27802737  | rs7653480    | rs9817112  | 0.26             |
| 3   | 181.85                | 211.30 | 177528430              | 194817287 | rs2220099    | rs7646250  | 0.60             |
| 4   | 5.64                  | 5.64   | 3552449                | 3552449   | rs6817919    | rs6817919  | 0.06             |
| 4   | 34.11                 | 40.61  | 17281982               | 24403895  | rs1558379    | rs2284659  | 0.60             |
| 4   | 67.05                 | 70.76  | 53686267               | 56537631  | rs10016091   | rs2593082  | 0.60             |
| 4   | 71.79                 | 73.84  | 57154247               | 58710633  | rs4864589    | rs12649436 | 0.60             |
| 4   | 74.76                 | 84.94  | 60177989               | 75798477  | rs7683528    | rs3923243  | 0.60             |
| 4   | 155.59                | 168.16 | 162726680              | 174890618 | rs4691773    | rs3890767  | 0.60             |
| 5   | 12.24                 | 28.30  | 4976629                | 10970489  | rs489095     | rs17789185 | 0.60             |
| 5   | 120.12                | 141.29 | 114940545              | 141448040 | rs256994     | rs12655443 | 0.60             |
| 5   | 151.57                | 172.82 | 148347836              | 166491185 | rs4705303    | rs1432944  | 0.60             |
| 6   | 6p-telomere           | 52.74  | 6p-telomere            | 33867268  | 6p-telomere  | rs6929696  | 0.60             |
| 6   | 167.81                | 168.49 | 159039967              | 159356582 | rs6901469    | rs2057061  | 0.60             |
| 6   | 169.76                | 181.23 | 159944835              | 166707233 | rs2053949    | rs4305699  | 0.60             |
| 7   | 7p-telomere           | 1.26   | 7p-telomere            | 257228    | 7p-telomere  | rs10268225 | 0.24             |
| 7   | 6.12                  | 16.09  | 2652585                | 8202431   | rs10950811   | rs2882042  | 0.60             |
| 7   | 19.30                 | 22.39  | 9400633                | 11452052  | rs2350842    | rs10262052 | 0.60             |
| 7   | 33.67                 | 34.86  | 19539376               | 20382351  | rs2080222    | rs3807945  | 0.52             |
| 7   | 122.61                | 161.07 | 115935144              | 148576210 | rs4727833    | rs886674   | 0.60             |
| 8   | 15.50                 | 16.05  | 6542966                | 6682255   | rs11137056   | rs2977802  | 0.30             |
| 8   | 33.13                 | 65.88  | 19320961               | 53931920  | rs6990357    | rs6473757  | 0.60             |
| 8   | 89.56                 | 99.57  | 78881129               | 95274293  | rs2139324    | rs10956904 | 0.60             |
| 9   | 9p-telomere           | 22.15  | 9p-telomere            | 10078517  | 9p-telomere  | rs413553   | 0.60             |
| 9   | 55.74                 | 85.62  | 33684161               | 88362487  | rs855427     | rs913356   | 0.60             |
| 9   | 111.17                | 111.70 | 109712194              | 109967341 | rs10816586   | rs510082   | 0.17             |
| 9   | 153.13                | 154.71 | 136762744              | 137046552 | rs3128606    | rs11103632 | 0.35             |
| 10  | 47.91                 | 94.70  | 24640014               | 77233106  | rs12258036   | rs1004603  | 0.60             |
| 10  | 95.70                 | 140.95 | 78063962               | 120418771 | rs751770     | rs17097926 | 0.60             |
| 10  | 142.87                | 143.41 | 121678217              | 121927920 | rs7895684    | rs2039347  | 0.60             |
| 10  | 145.08                | 146.00 | 122985131              | 123219616 | rs12220647   | rs2420941  | 0.22             |
| 10  | 151.52                | 151.52 | 126144789              | 126144789 | rs1254947    | rs1254947  | 0.25             |
| 11  | 11p-telomere          | 13.56  | 11p-telomere           | 8051078   | 11p-telomere | rs6578921  | 0.60             |
| 11  | 14.58                 | 17.99  | 8546224                | 11148063  | rs9736791    | rs12363497 | 0.60             |
| 11  | 64.95                 | 65.50  | 59656682               | 60188058  | rs4939312    | rs10897105 | 0.31             |
| 11  | 125.45                | 155.09 | 121299396              | 134449982 | rs17337467   | rs11224232 | 0.60             |
| 12  | 38.63                 | 44.39  | 20372259               | 24186749  | rs10770641   | rs10505937 | 0.60             |
| 12  | 105.59                | 112.57 | 93671268               | 100144673 | rs7296947    | rs2673689  | 0.60             |
| 12  | 127.37                | 130.79 | 111585377              | 113881331 | rs17824620   | rs2077395  | 0.60             |
| 13  | 54.25                 | 129.42 | 50537801               | 113957543 | rs9596434    | rs10467349 | 0.60             |
| 14  | 45.18                 | 47.62  | 46643032               | 50069943  | rs10145984   | rs3783408  | 0.31             |

|    |              |        |              |          |              |            |      |
|----|--------------|--------|--------------|----------|--------------|------------|------|
| 14 | 76.83        | 80.82  | 76403716     | 80018586 | rs2242629    | rs7143237  | 0.60 |
| 14 | 101.92       | 102.48 | 94873609     | 95013301 | rs999986     | rs8020368  | 0.25 |
| 15 | 73.08        | 85.21  | 67777591     | 78616704 | rs919054     | rs4238523  | 0.60 |
| 15 | 95.92        | 100.91 | 88193157     | 90579071 | rs11635652   | rs1080865  | 0.60 |
| 16 | 16p-telomere | 12.61  | 16p-telomere | 5221560  | 16p-telomere | rs10459837 | 0.60 |
| 16 | 59.10        | 99.81  | 48233308     | 78227563 | rs1861657    | rs7189933  | 0.60 |
| 17 | 13.19        | 14.01  | 5263952      | 5630509  | rs1806269    | rs17645516 | 0.32 |
| 17 | 87.67        | 101.21 | 53180700     | 65237250 | rs12949688   | rs2947870  | 0.60 |
| 17 | 104.93       | 133.24 | 67349312     | 76876404 | rs757992     | rs10445407 | 0.60 |
| 18 | 85.58        | 113.52 | 57163169     | 72656141 | rs11152292   | rs6420510  | 0.60 |
| 19 | 19p-telomere | 33.55  | 19p-telomere | 13283724 | 19p-telomere | rs2419244  | 0.60 |
| 19 | 107.31       | 113.08 | 61287529     | 63749895 | rs11672395   | rs7249714  | 0.60 |
| 20 | 20p-telomere | 49.37  | 20p-telomere | 20131966 | 20p-telomere | rs16981689 | 0.60 |
| 21 | 18.14        | 18.94  | 20478347     | 20801025 | rs2826065    | rs6517967  | 0.19 |
| 22 | 22p-telomere | 47.97  | 22p-telomere | 37883718 | 22p-telomere | rs139413   | 0.60 |
| 22 | 60.78        | 75.64  | 44616787     | 49576671 | rs4823324    | rs9616985  | 0.60 |

Genomic coordinates refer to GRCh37/hg19 assembly.

**Supplementary Table 3** Shared exonic variants by affected individuals III:2 and III:3 in family GC16334 after variant filtering.

| Chrom     | Pos              | Ref allele | Alt allele | HGVS variant                       | Gene             | Variant type     | Linkage (max LOD in family GC16334) | Does segregate? (Y/N) |
|-----------|------------------|------------|------------|------------------------------------|------------------|------------------|-------------------------------------|-----------------------|
| <b>2</b>  | <b>74720283</b>  | <b>G</b>   | <b>C</b>   | <b>c.1498G&gt;C:p.(Asp500His)</b>  | <b>TTC31</b>     | <b>missense</b>  | <b>0.60</b>                         | <b>N</b>              |
| 4         | 129776852        | A          | G          | c.764A>G:p.(Gln255Arg)             | PHF17            | missense         | < -2                                |                       |
| <b>4</b>  | <b>170042051</b> | <b>T</b>   | <b>C</b>   | <b>c.1436A&gt;G:p.(Gln479Arg)</b>  | <b>SH3RF1</b>    | <b>missense</b>  | <b>0.60</b>                         | <b>Y</b>              |
| <b>5</b>  | <b>10618520</b>  | <b>G</b>   | <b>A</b>   | <b>c.442G&gt;A:p.(Val148Ile)</b>   | <b>ANKRD33B</b>  | <b>missense</b>  | <b>0.60</b>                         | <b>Y</b>              |
| 5         | 36608576         | A          | T          | c.51A>T:p.(Arg17Ser)               | SLC1A3           | missense         | < -2                                |                       |
| <b>5</b>  | <b>140223103</b> | <b>C</b>   | <b>G</b>   | <b>c.2197C&gt;G:p.(Arg733Gly)</b>  | <b>PCDHA8</b>    | <b>missense</b>  | <b>0.60</b>                         | <b>N</b>              |
| 5         | 179292977        | T          | G          | c.48A>C:p.(Glu16Asp)               | TBC1D9B          | missense         | < -2                                |                       |
| <b>6</b>  | <b>27100363</b>  | <b>G</b>   | <b>A</b>   | <b>c.167C&gt;T:p.(Ser56Leu)</b>    | <b>HIST1H2BJ</b> | <b>missense</b>  | <b>0.60</b>                         | <b>Y</b>              |
| 6         | 71190714         | A          | G          | c.524A>G:p.(Lys175Arg)             | FAM135A          | missense         | < -2                                |                       |
| <b>8</b>  | <b>27401706</b>  | <b>C</b>   | <b>A</b>   | <b>c.1534C&gt;A:p.(Pro512Thr)</b>  | <b>EPHX2</b>     | <b>missense</b>  | <b>0.60</b>                         | <b>Y</b>              |
| <b>8</b>  | <b>42166476</b>  | <b>G</b>   | <b>A</b>   | <b>c.625G&gt;A:p.(Gly209Ser)</b>   | <b>IKBKB</b>     | <b>missense</b>  | <b>0.60</b>                         | <b>Y</b>              |
| <b>9</b>  | <b>2191340</b>   | <b>A</b>   | <b>G</b>   | <b>c.4669A&gt;G:p.(Arg1557Gly)</b> | <b>SMARCA2</b>   | <b>missense</b>  | <b>0.60</b>                         | <b>N</b>              |
| 10        | 5246413          | A          | C          | c.326A>C:p.(Asp109Ala)             | AKR1C4           | missense         | < -2                                |                       |
| 11        | 22363102         | G          | A          | c.115G>A:p.(Glu39Lys)              | SLC17A6          | missense         | < -2                                |                       |
| 11        | 67787217         | G          | A          | c.511G>A:p.(Glu171Lys)             | ALDH3B1          | missense         | < -2                                |                       |
| 12        | 9095025          | C          | G          | c.698G>C:p.(Gly233Ala)             | M6PR             | missense         | < -2                                |                       |
| 12        | 50188846         | G          | A          | c.1576C>T:p.(Arg526Cys)            | NCKAP5L          | missense         | < -2                                |                       |
| 12        | 120652735        | TCTC       | T          | c.1168_1170del:p.(Glu390del)       | PXN              | inframe deletion | < -2                                |                       |
| 13        | 41941590         | A          | T          | c.1555A>T:p.(Thr519Ser)            | NAA16            | missense         | < -2                                |                       |
| 13        | 46619120         | C          | T          | c.197G>A:p.(Arg66His)              | ZC3H13           | missense         | < -2                                |                       |
| <b>13</b> | <b>52722555</b>  | <b>G</b>   | <b>A</b>   | <b>c.661C&gt;T:p.(His221Tyr)</b>   | <b>NEK3</b>      | <b>missense</b>  | <b>0.60</b>                         | <b>N</b>              |
| 14        | 24975419         | G          | A          | c.415C>T:p.(Pro139Ser)             | CMA1             | missense         | < -2                                |                       |
| 15        | 41192795         | G          | C          | c.1779G>C:p.(Gln593His)            | VPS18            | missense         | < -2                                |                       |
| 15        | 42169070         | C          | T          | c.3788G>A:p.(Arg1263Gln)           | SPTBN5           | missense         | < -2                                |                       |
| 15        | 51975596         | A          | G          | c.362A>G:p.(Asp121Gly)             | SCG3             | missense         | < -2                                |                       |
| <b>15</b> | <b>75189982</b>  | <b>G</b>   | <b>A</b>   | <b>c.1183G&gt;A:p.(Val395Met)</b>  | <b>MPI</b>       | <b>missense</b>  | <b>0.60</b>                         | <b>N</b>              |
| <b>16</b> | <b>2505557</b>   | <b>A</b>   | <b>G</b>   | <b>c.1877A&gt;G:p.(Glu626Gly)</b>  | <b>CCNF</b>      | <b>missense</b>  | <b>0.60</b>                         | <b>Y</b>              |
| 16        | 29996679         | G          | A          | c.1568G>A:p.(Arg523Gln)            | TAOK2            | missense         | < -2                                |                       |

|           |                 |          |          |                                  |                        |                 |             |          |
|-----------|-----------------|----------|----------|----------------------------------|------------------------|-----------------|-------------|----------|
| 17        | 8215425         | G        | A        | c.68G>A:p.(Arg23His)             | <i>ARHGEF15</i>        | missense        | < -2        |          |
| 17        | 42273441        | T        | A        | c.505A>T:p.(Asn169Tyr)           | <i>ATXN7L3</i>         | missense        | < -2        |          |
| 18        | 48327850        | C        | T        | c.454G>A:p.(Ala152Thr)           | <i>MRO</i>             | missense        | < -2        |          |
| <b>19</b> | <b>3770858</b>  | <b>G</b> | <b>T</b> | <b>c.454C&gt;A:p.(Leu152Met)</b> | <b><i>RAX2</i></b>     | <b>missense</b> | <b>0.60</b> | <b>Y</b> |
| <b>19</b> | <b>5915299</b>  | <b>T</b> | <b>G</b> | <b>c.536T&gt;G:p.(Phe179Cys)</b> | <b><i>CAPS</i></b>     | <b>missense</b> | <b>0.60</b> | <b>N</b> |
| <b>22</b> | <b>24106847</b> | <b>C</b> | <b>G</b> | <b>c.287C&gt;G:p.(Thr96Ser)</b>  | <b><i>C22orf15</i></b> | <b>missense</b> | <b>0.60</b> | <b>Y</b> |

Genomic coordinates refer to GRCh37/hg19 assembly. Highlighted in bold are the variants in a linkage region of maximum LOD score of 0.60 on which segregation analysis was performed.

**Supplementary Table 4** Human Phenotype Ontology (HPO) terms used in the Exomiser variant prioritisation analysis (Robinson et al. 2014) to describe the phenotypic abnormalities seen in patients from family GC16500 and family GC16334.

| HPO term                     | Description                |
|------------------------------|----------------------------|
| <b><i>Family GC16500</i></b> |                            |
| HP:0000567                   | Chorioretinal coloboma     |
| HP:0100490                   | Camptodactyly of finger    |
| HP:0100257                   | Ectrodactyly               |
| HP:0001159                   | Syndactyly                 |
| <b><i>Family GC16334</i></b> |                            |
| HP:0000567                   | Chorioretinal coloboma     |
| HP:0005831                   | Type B brachydactyly       |
| HP:0005848                   | Bifid thumb distal phalanx |
| HP:0100490                   | Camptodactyly of finger    |
| HP:0001159                   | Syndactyly                 |
| HP:0000104                   | Renal agenesis             |



**Supplementary Table 5** Variant prioritisation analysis using Exomiser<sup>1</sup> and the Human Phenotype Ontology (HPO) terms in Supplementary Table S4 for the variants identified in family GC16334.

| Variant (Gene)                  | Exomiser score | Exomiser phenotypic score | Exomiser variant score | Human phenotypic score | Mouse phenotypic score | Fish phenotypic score | Walker score | Exomiser phenotypic similarity                                                                                                                                                                                                                                                                                                                                                                                                                                                                                                                                                                                                                                                                                                                 |
|---------------------------------|----------------|---------------------------|------------------------|------------------------|------------------------|-----------------------|--------------|------------------------------------------------------------------------------------------------------------------------------------------------------------------------------------------------------------------------------------------------------------------------------------------------------------------------------------------------------------------------------------------------------------------------------------------------------------------------------------------------------------------------------------------------------------------------------------------------------------------------------------------------------------------------------------------------------------------------------------------------|
| p.Gly209Ser ( <i>IKBKB</i> )    | 0.7491         | 0.50                      | 1                      | 0                      | 0                      | 0                     | 0.50         | Proximity in <a href="#">interactome to PCSK5</a> and phenotypic similarity to mouse mutant of <i>PCSK5</i> [persistent truncus arteriosus (MP:0002633), polydactyly (MP:0000562), syndactyly (MP:0000564), absent kidney (MP:0000520)]                                                                                                                                                                                                                                                                                                                                                                                                                                                                                                        |
| p.Gln479Arg ( <i>SH3RF1</i> )   | 0.4621         | 0.50                      | 0.86                   | 0                      | 0                      | 0                     | 0.50         | Proximity in <a href="#">interactome to ILK</a> and phenotypic similarity to mouse mutant of <i>ILK</i> [MP:0000520, absent kidney]                                                                                                                                                                                                                                                                                                                                                                                                                                                                                                                                                                                                            |
| p.Pro512Thr ( <i>EPHX2</i> )    | 0.4620         | 0.50                      | 0.86                   | 0                      | 0.30                   | 0.16                  | 0.50         | Phenotypic similarity to mouse mutant involving <a href="#">EPHX2</a> [abnormal retinal vasculature morphology (MP:0002792)]; Phenotypic similarity to zebrafish mutant involving <a href="#">HGNC:3402</a> [ZP:0003348, abnormal(ly) mislocalised anteriorly pancreas]; Proximity in <a href="#">interactome to DHCR7</a> and phenotypic similarity to <a href="#">Smith-Lemli-Opitz syndrome</a> associated with <i>DHCR7</i> [Iris coloboma (HP:0000612), Brachydactyly syndrome (HP:0001156), Postaxial hand polydactyly (HP: 0001162), Finger syndactyly (HP:0006101), Renal agenesis (HP:0000104)] and to mouse mutant of <i>DHCR7</i> [syndactyly (MP:0000564)]                                                                         |
| p.Glu626Gly ( <i>CCNF</i> )     | 0.4619         | 0.50                      | 0.86                   | 0                      | 0.31                   | 0                     | 0.50         | Phenotypic similarity to mouse mutant involving <a href="#">CCNF</a> [abnormal vitelline vasculature morphology (MP:0003229), small hindlimb buds (MP:0013169)]; Proximity in <a href="#">interactome to GLI3</a> and phenotypic similarity to <a href="#">Pallister-Hall syndrome</a> associated with <i>GLI3</i> [Preductal coarctation of the aorta (HP:0005151), Brachydactyly syndrome (HP:0001156), Mesoaxial hand polydactyly (HP:0006159), Finger syndactyly (HP:0006101), Renal hypoplasia/aplasia (HP:0008678)]; Proximity in <a href="#">interactome to GLI3</a> and phenotypic similarity to mouse mutant of <i>GLI3</i> [polydactyly (MP:0000562), camptomelia (MP:0011505), syndactyly (MP:0000564), single kidney (MP:0003604)] |
| p.Leu152Met ( <i>RAX2</i> )     | 0.1902         | 0.26                      | 1                      | 0.26                   | 0                      | 0                     | 0            | Phenotypic similarity to <a href="#">Cone-rod dystrophy 11</a> associated with <i>RAX2</i> [Cone-rod dystrophy (HP:0000548)]                                                                                                                                                                                                                                                                                                                                                                                                                                                                                                                                                                                                                   |
| p.Val148Ile ( <i>ANKRD33B</i> ) | 0.0162         | 0                         | 1                      | 0                      | 0                      | 0                     | 0            | No phenotype or Protein-Protein-Interaction evidence                                                                                                                                                                                                                                                                                                                                                                                                                                                                                                                                                                                                                                                                                           |

|                                           |               |   |      |   |   |   |   |                                                      |
|-------------------------------------------|---------------|---|------|---|---|---|---|------------------------------------------------------|
| <b>p.Ser56Leu</b><br>( <i>HIST1H2BJ</i> ) | <b>0.0047</b> | 0 | 0.86 | 0 | 0 | 0 | 0 | No phenotype or Protein-Protein-Interaction evidence |
| <b>p.Thr96Ser</b><br>( <i>C22orf15</i> )  | <b>0.0002</b> | 0 | 0.50 | 0 | 0 | 0 | 0 | No phenotype or Protein-Protein-Interaction evidence |

## REFERENCES

1. Robinson PN, Köhler S, Oellrich A, et al. Improved exome prioritization of disease genes through cross-species phenotype comparison. *Genome Res.* 2014;24(2):340-348. doi:10.1101/gr.160325.113.
